# Supplementary figures and images for: The Amyloid Forming Peptides Islet Amyloid Polypeptide and Amyloid β Interact at the Molecular Level
Source: MDPI journal article supplement (doi:10.3390/ijms222011153), 2021-10-15

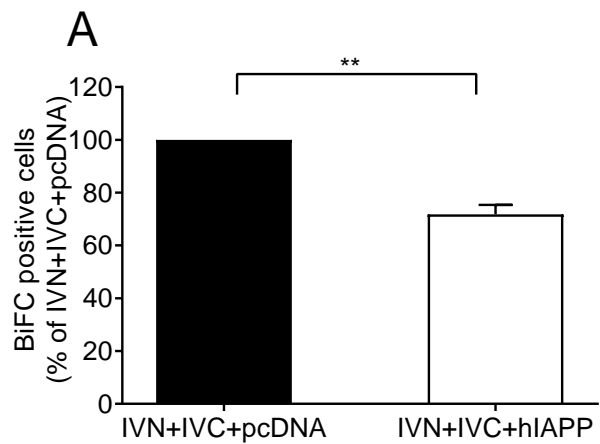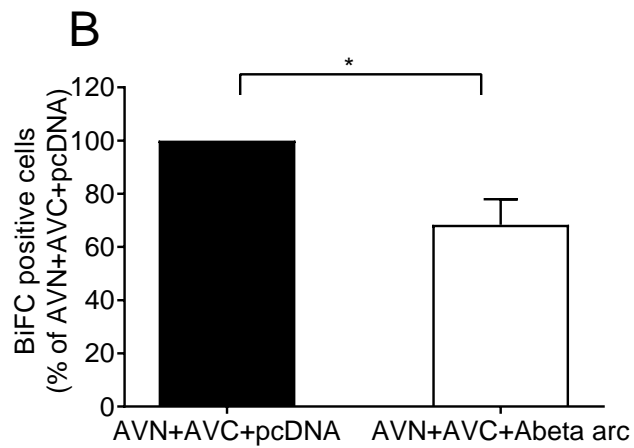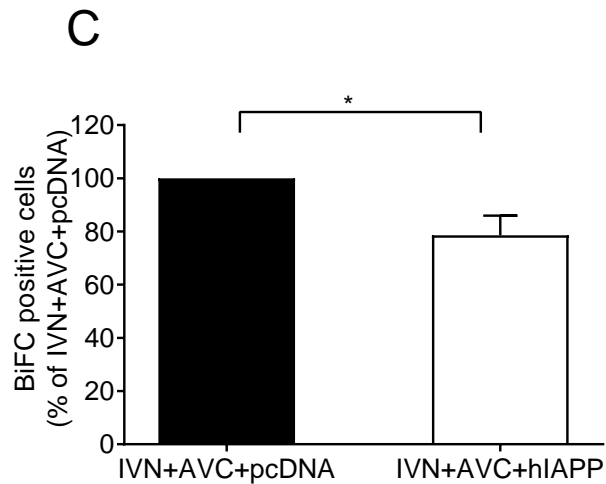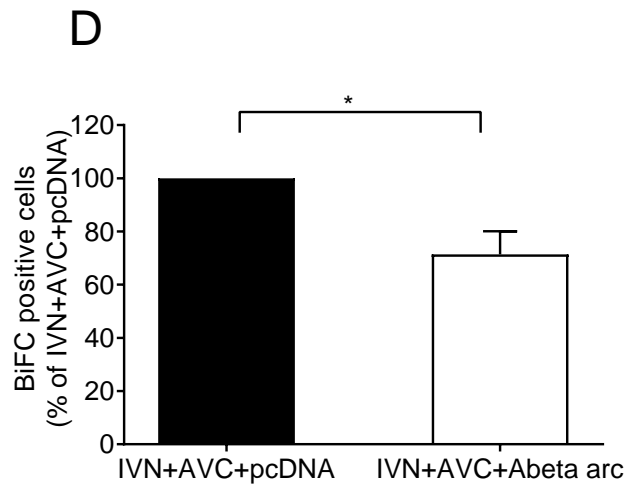

Supplement: s1 [file s1]

**A**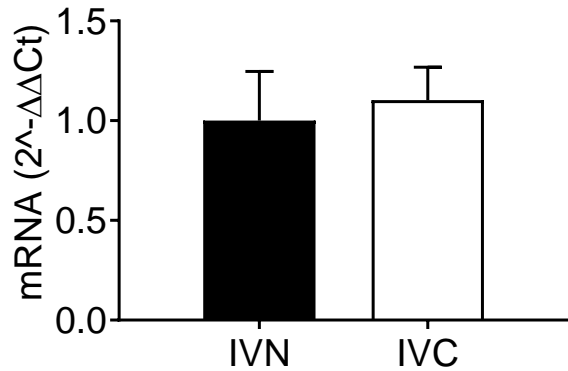**B**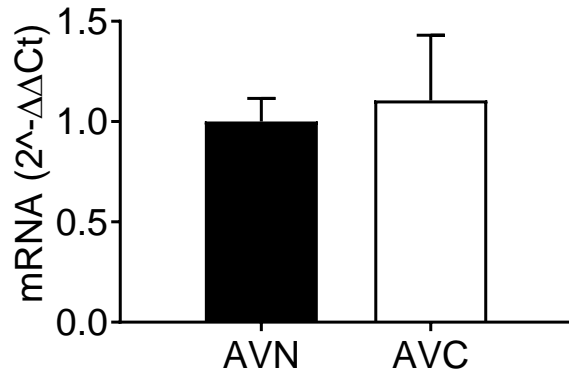

Supplement: s1 [file s1]

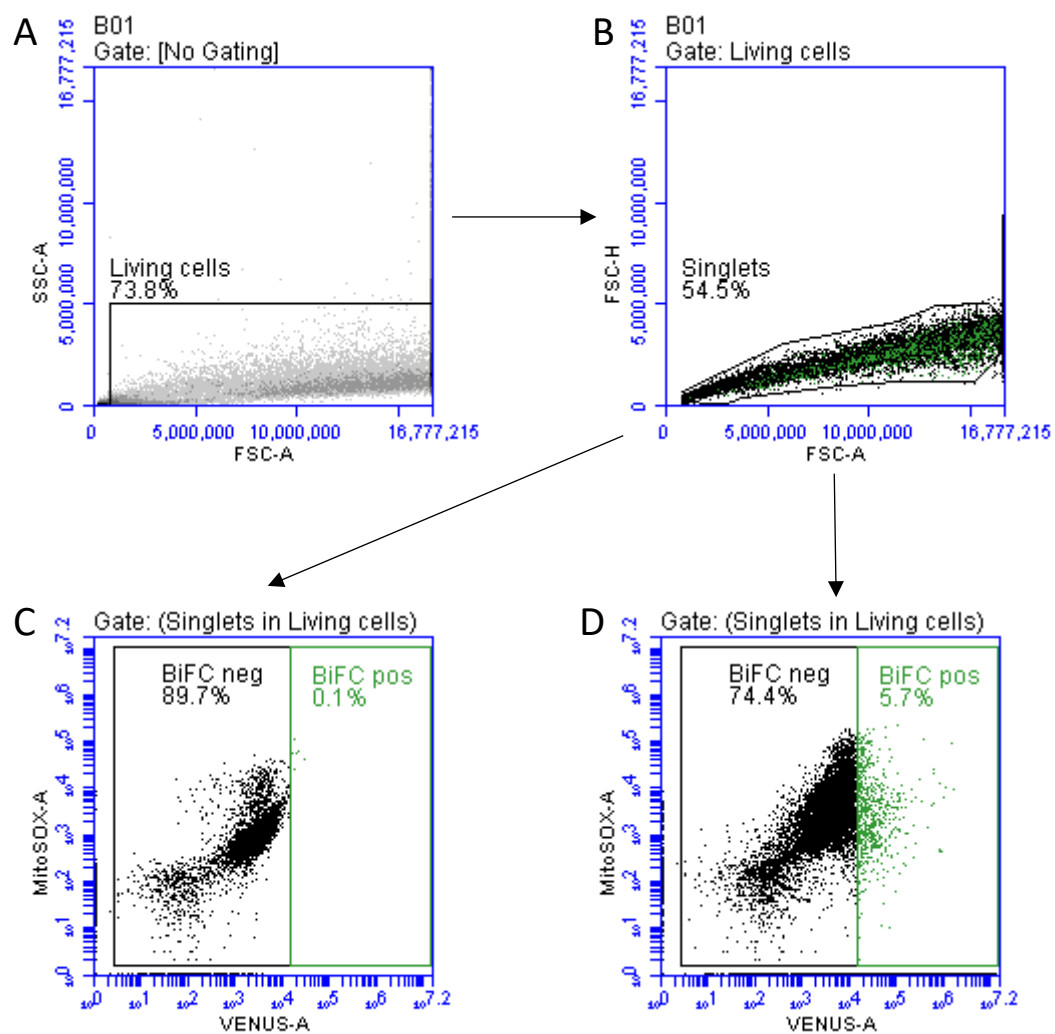

Supplement: s1 [file s1]
